# Supplementary material for: Managing Case Quality in a CBR Diagnostic System.
Source: Royal Society of Chemistry journal article supplement (doi:10.1039/c2an35535c), 2005-01-01
Supplement: c2an35535c.pdf [file c2an35535c.pdf]

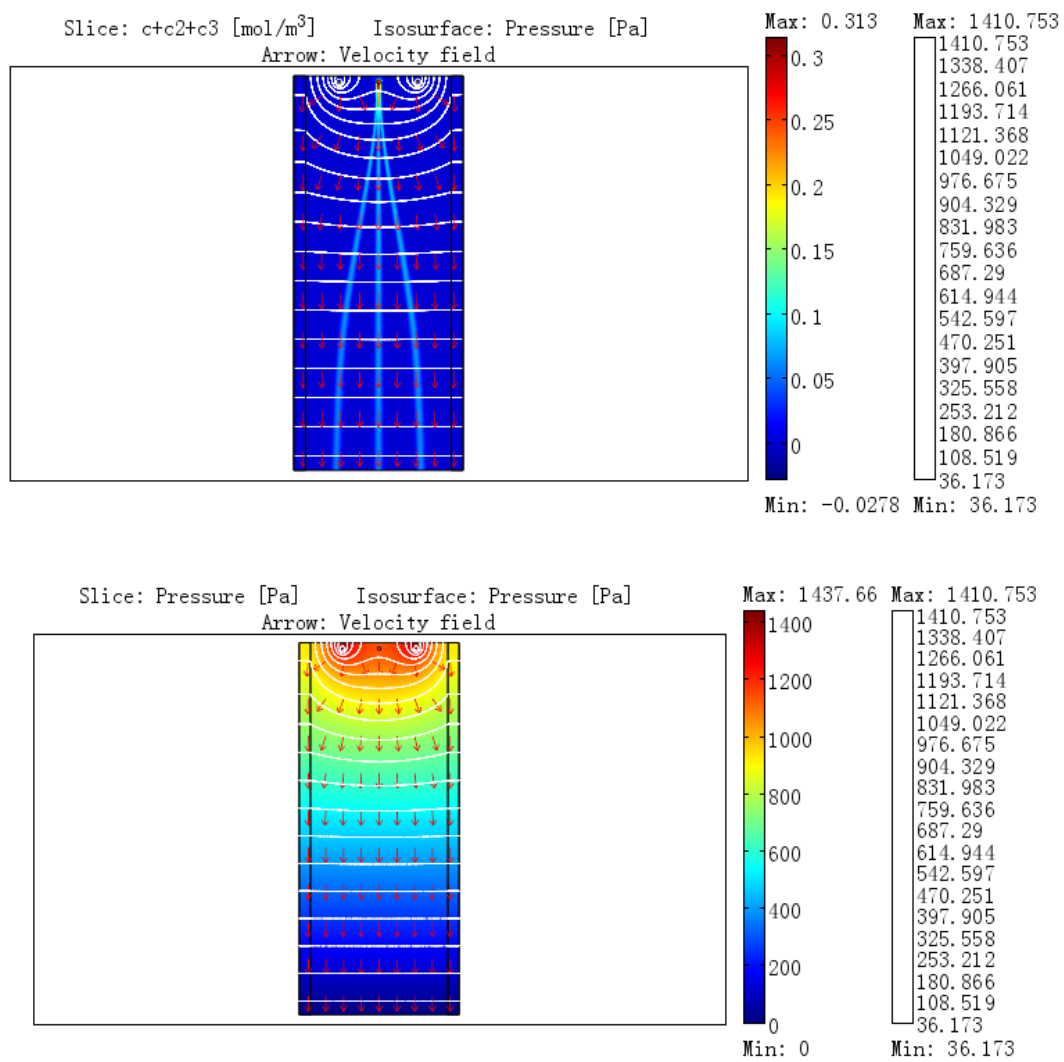

Figure 1. The simulation results of model I

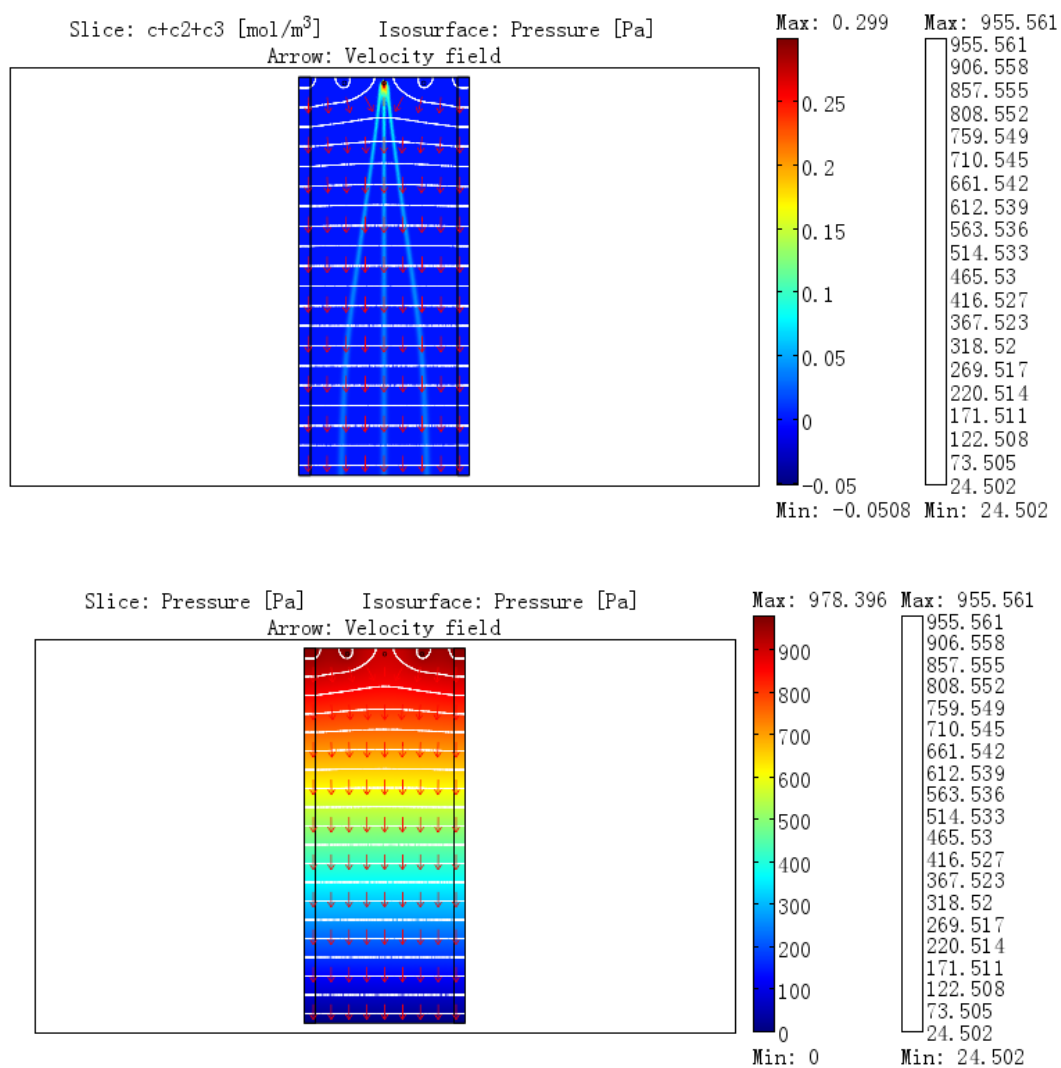

Figure 2. The simulation results of model II

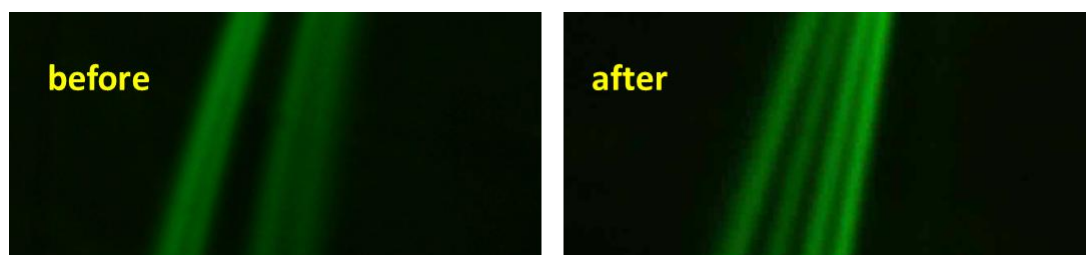

Figure 3 Comparison of Fluorescence images before / after coating
